# Supplementary material
Source: MDPI journal article supplement (https://www.mdpi.com/2073-4441/16/1/151)
Supplement: s1 [file s1]

# Assessing the impacts of climate change and water extraction on thermal stratification and water quality of a subtropical lake using the GLM-AED model

Chao Deng<sup>a\*</sup>, Hong Zhang<sup>a</sup>, David P. Hamilton<sup>b</sup>

<sup>a</sup>School of Engineering and Built Environment, Griffith University, QLD 4222, Australia

<sup>b</sup>Australian Rivers Institute, Griffith University, QLD 4111, Australia

\*Corresponding author:

E-mail address: chao.deng@griffithuni.edu.au (Chao Deng)

## Contents of this file

Figures S1

Table S1

Table S2

Figure S2

## Introduction

The auxiliary material includes one auxiliary figure (Figure S1) and two auxiliary tables (Table S1 and Table S2).

**Figure S1** Surface area and spillway elevation for Advancetown Lake. The black dash lines refer to the spillway elevations after dam upgrades.

**Table S1** Climate change scenarios and lake's hydrodynamics responding to warming air temperature (T), climate change and upstream catchment hydrological variations (CC), and an increase of 50% in water withdrawal from CC condition by two future periods of '2050s' (2040 – 2069) and '2080s' (2070 – 2099) under emission scenarios of RCP4.5 and RCP8.5, respectively.

**Table S2** Projected changes in air temperature (Ta), rainfall (PCP), and streamflow (Q), loads of sediment (SS) and nutrient (TN: total nitrogen, TP: total phosphorus) from Upper Nerang River catchment under climate change conditions of RCP4.5 (R45 & R48) and RCP8.5 (R85 & R88) during two future periods of 2050s and 2080s simulated with the SWAT hydrological model (under review). The green to yellow colour bar refers to a change range of 0 – 5 °C in

Ta while the pink to blue colour bar presents a relative change range from -70% to 70% in rainfall and catchment hydrological outputs under future climate change.

**Figure S1** Distribution of thermal stratification periods under baseline conditions and different future scenarios regarding warming temperatures, climate change, and increasing water demand over the baseline period from July 2011 to July 2019.

**Figure S2** Distribution of thermal stratification periods under baseline conditions and different future scenarios regarding warming temperatures, climate change, and increasing water demand over the baseline period from July 2011 to July 2019.

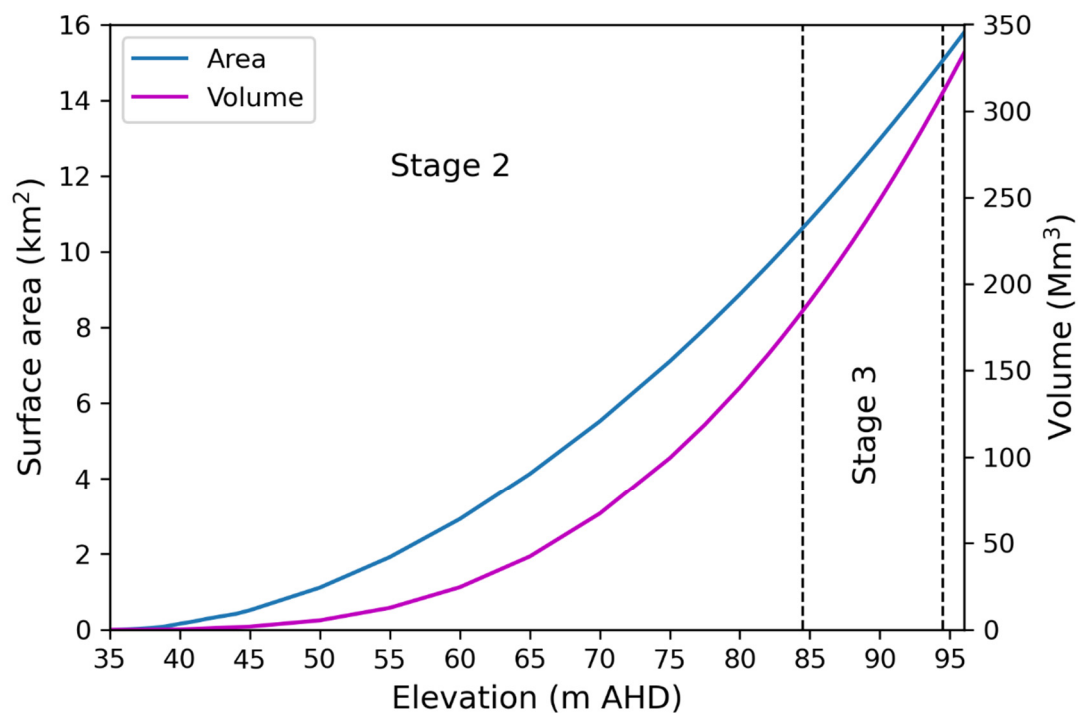

Figure S1 Surface area and spillway elevation for Advancetown Lake. The black dash lines refer to the spillway elevations after dam upgrades.

Table S1 Climate change scenarios and lake's hydrodynamics responding to warming air temperature (T), climate change and upstream catchment hydrological variations (CC), and an increase of 50% in water withdrawal from CC condition by two future periods of '2050s' (2040 – 2069) and '2080s' (2070 – 2099) under emission scenarios of RCP4.5 and RCP8.5, respectively.

| Climate change scenario | Lake scenario |        |        |
|-------------------------|---------------|--------|--------|
|                         | T             | CC     | CE     |
| R45: RCP4.5 + 2050s     | R45-T         | R45-CC | R45-CE |
| R48: RCP4.5 + 2080s     | R48-T         | R48-CC | R48-CE |
| R85: RCP8.5 + 2050s     | R85-T         | R85-CC | R85-CE |
| R88: RCP8.5 + 2080s     | R88-T         | R88-CC | R88-CE |

Table S2 Projected changes in air temperature ( $T_a$ ), rainfall (PCP), and streamflow (Q), loads of sediment (SS) and nutrient (TN: total nitrogen, TP: total phosphorus) from Upper Nerang River catchment under climate change conditions of RCP4.5 (R45 & R48) and RCP8.5 (R85 & R88) during two future periods of 2050s and 2080s simulated with the SWAT hydrological model (under review). The green to yellow colour bar refers to a change range of 0 – 5 °C in  $T_a$  while the pink to blue colour bar presents a relative change range from -70% to 70% in rainfall and catchment hydrological outputs under future climate change.

| Variable   | Scenario | Jan   | Feb   | Mar   | Apr  | May   | Jun   | Jul   | Aug   | Sep   | Oct   | Nov   | Dec   | Annual |
|------------|----------|-------|-------|-------|------|-------|-------|-------|-------|-------|-------|-------|-------|--------|
| $T_a$ (°C) | R45      | 1.3   | 1.4   | 1.3   | 1.2  | 1.3   | 1.3   | 1.5   | 1.4   | 1.4   | 1.4   | 1.4   | 1.3   | 1.4    |
|            | R48      | 1.7   | 1.8   | 1.7   | 1.7  | 1.9   | 1.9   | 2.1   | 2.0   | 2.1   | 1.9   | 1.9   | 1.7   | 1.9    |
|            | R85      | 2.0   | 2.0   | 1.8   | 1.9  | 1.9   | 2.0   | 2.1   | 1.9   | 2.1   | 2.1   | 2.2   | 2.2   | 2.0    |
|            | R88      | 3.8   | 3.8   | 3.7   | 3.7  | 3.8   | 3.8   | 3.9   | 3.8   | 3.8   | 4.0   | 4.2   | 4.0   | 3.9    |
| PCP (%)    | R45      | 6.8   | 21.5  | 12.5  | 2.0  | -13.6 | -10.3 | -10.0 | -8.3  | -6.7  | 6.2   | 7.3   | 2.7   | 5.3    |
|            | R48      | 10.3  | -2.1  | 4.6   | 3.9  | -5.3  | -14.6 | -3.9  | -14.5 | -11.7 | -1.4  | 6.4   | 5.0   | 1.4    |
|            | R85      | 16.8  | 2.7   | -6.1  | 6.7  | -15.4 | -1.7  | -5.1  | 0.4   | -5.7  | -12.3 | -10.7 | 0.2   | 0.7    |
|            | R88      | 11.6  | 1.4   | 4.2   | 5.8  | -5.6  | 7.8   | -11.7 | -10.5 | -9.0  | -19.9 | -6.6  | -0.7  | 1.8    |
| Q (%)      | R45      | 0.3   | 30.1  | 24.6  | 25.7 | 1.4   | -10.8 | -13.3 | -12.2 | -12.4 | -0.5  | 5.9   | -2.9  | 11.7   |
|            | R48      | 4.6   | -6.2  | 5.0   | 12.6 | 3.0   | -19.5 | -17.3 | -21.9 | -23.0 | -15.7 | -2.1  | -3.2  | -8.7   |
|            | R85      | 10.4  | 0.9   | -12.7 | 3.6  | -9.9  | -5.2  | -12.0 | -9.1  | -13.3 | -31.8 | -31.1 | -19.9 | -3.9   |
|            | R88      | -0.7  | -6.0  | 1.4   | 10.5 | 0.6   | 9.1   | -9.6  | -14.8 | -16.8 | -44.3 | -31.5 | -22.1 | -3.9   |
| SS (%)     | R45      | -24.7 | 11.5  | 6.2   | 22.9 | -35.1 | -33.6 | -30.0 | -49.6 | -41.1 | -17.9 | -11.5 | -15.0 | -1.9   |
|            | R48      | -20.3 | -30.9 | -13.1 | 9.6  | -29.2 | -45.2 | -30.0 | -58.1 | -54.1 | -34.6 | -20.6 | -15.5 | -28.8  |
|            | R85      | -9.1  | -20.5 | -32.6 | -1.8 | -39.5 | -26.2 | -23.0 | -40.1 | -38.6 | -54.6 | -54.7 | -36.5 | -19.3  |
|            | R88      | -16.6 | -27.9 | -15.9 | 7.7  | -30.0 | -8.8  | -24.0 | -51.8 | -46.8 | -66.6 | -55.7 | -32.3 | -19.3  |
| TN (%)     | R45      | -6.2  | 13.6  | -11.6 | 15.7 | -26.6 | -24.1 | -38.6 | -33.1 | -38.1 | -17.7 | 0.2   | -8.2  | -8.7   |
|            | R48      | -0.1  | -20.4 | -25.6 | 6.3  | -18.9 | -30.7 | -38.9 | -42.0 | -47.8 | -30.7 | -4.6  | -5.9  | -25.2  |
|            | R85      | 8.0   | -14.4 | -39.3 | -0.5 | -32.0 | -16.0 | -35.2 | -18.7 | -36.2 | -44.4 | -35.1 | -20.9 | -21.6  |
|            | R88      | -3.2  | -19.3 | -28.4 | 5.6  | -19.5 | -0.6  | -35.9 | -35.5 | -42.2 | -54.5 | -33.3 | -23.1 | -21.6  |
| TP (%)     | R45      | -5.7  | 18.3  | 6.2   | 15.5 | -28.6 | -27.6 | -38.8 | -36.4 | -41.9 | -15.0 | -1.9  | -11.2 | -2.7   |
|            | R48      | 0.5   | -19.0 | -9.3  | 6.4  | -20.0 | -33.7 | -38.6 | -45.0 | -51.1 | -28.7 | -6.5  | -8.8  | -21.1  |
|            | R85      | 8.9   | -12.7 | -26.5 | -0.7 | -33.4 | -19.6 | -35.1 | -22.5 | -40.1 | -42.3 | -36.4 | -23.3 | -15.7  |
|            | R88      | -2.3  | -17.1 | -12.5 | 5.7  | -20.1 | -4.2  | -36.0 | -38.8 | -45.7 | -52.7 | -34.6 | -25.5 | -15.7  |

0

5

-70

70

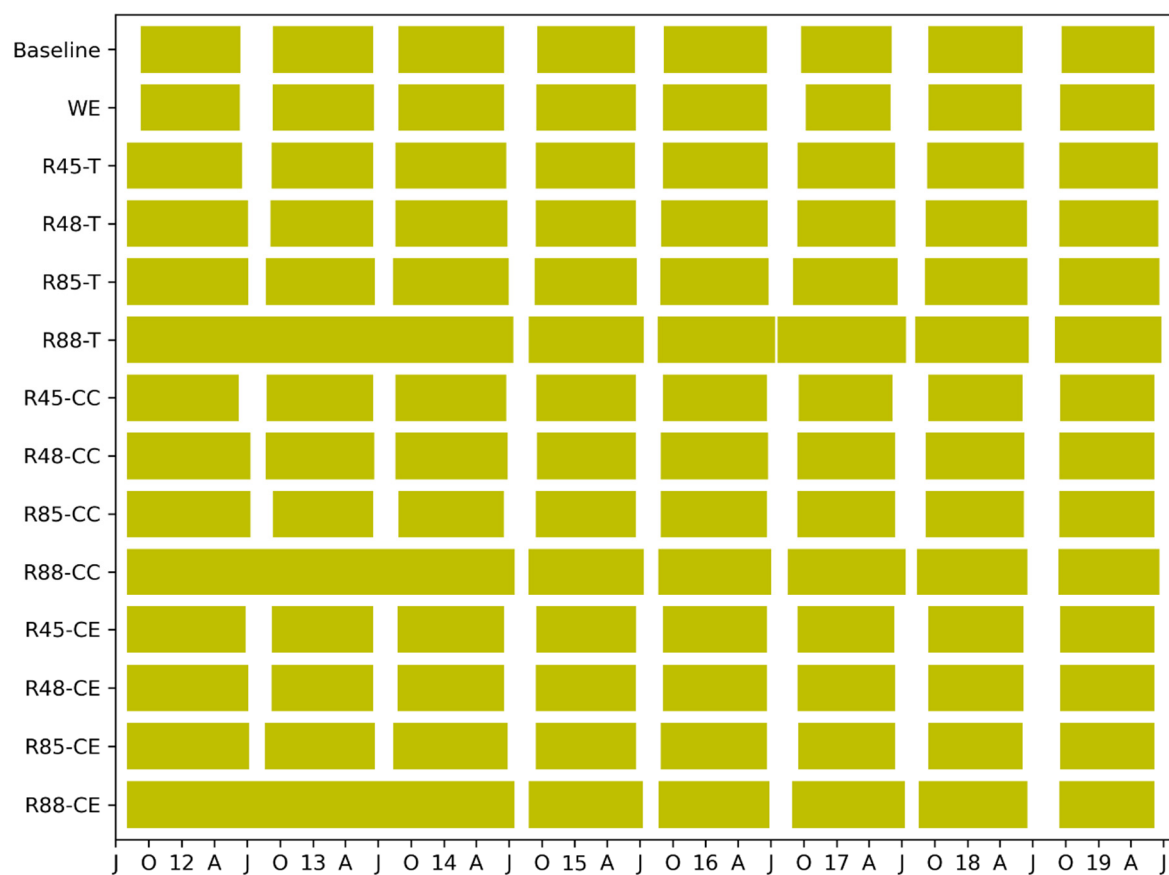

Figure S2 Distribution of thermal stratification periods under baseline conditions and different future scenarios regarding warming temperatures, climate change, and increasing water demand over the baseline period from July 2011 to July 2019.
